# Supplementary material
Source: publisher figshare collection journal article supplement (https://acs.figshare.com/ndownloader/files/4745407)

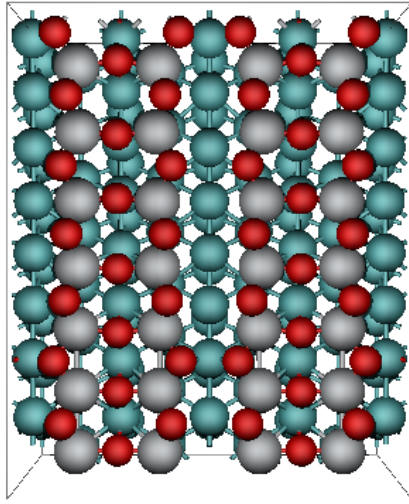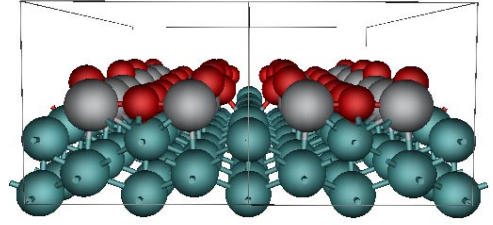

Top and side views of the Mo(112)-(8x2)-Ti<sub>2</sub>O<sub>3</sub> surface.

Supplement: Supplementary file 1 [file 4745407]
